# Supplementary material for: Probabilistic reanalysis of storm surge extremes in Europe
Source: PubMed Central journal article supplement (PMC6994974; doi:10.1073/pnas.1913049117), 2020-01-13
Supplement: pnas.1913049117.sapp.pdf [file pnas.1913049117.sapp.pdf]

1 Supplementary Information for  
2  
3 Probabilistic reanalysis of storm surge extremes in Europe  
4  
5 Francisco M. Calafat\*, Marta Marcos  
6 \*Corresponding author.  
7 E-mail: francisco.calafat@noc.ac.uk  
8  
9 **This PDF file includes:**  
10  
11       Supplementary text  
12       Figures S1 to S12  
13       Table S1  
14       SI References  
15  
16

## 17 **Supplementary Information Text**

### 18 **Exploratory analysis on the spatial structure of the GEV shape parameter**

19 Here we demonstrate, based on quantitative analysis, that it is appropriate to model the  
20 GEV shape parameter as being spatially constant. We begin by showing the shape  
21 parameter values at each tide gauge station as estimated by individual GEV fits (SI  
22 Appendix, Fig. S5A). While the map suggests some small regions of coherence, the  
23 spatial structure is much weaker than in the case of the location and scale parameters  
24 and there are significant differences, even in sign, between nearby stations. As a means  
25 of establishing whether the differences in the shape parameter across tide gauges reflect  
26 true differences or sampling error, we have conducted the following analysis. First, we  
27 simulate data from a GEV with the location and scale parameters set to the actual  
28 observed values (estimated using individual GEV fits) at each tide gauge site but with a  
29 constant shape parameter for all sites. The sample size of the simulated data at each site  
30 is the same as that in the tide gauge record. Then we estimate the value of the shape  
31 parameter from the simulated data at each site using the single-site GEV model and  
32 compare those with the values derived (also using individual GEV fits) from the  
33 observed data. Histograms of the two sets of shape parameters are very similar (SI  
34 Appendix, Fig. S5B), suggesting that the differences in the shape parameter are likely  
35 due to sampling error (i.e., small sample sizes). Indeed, a two-sample Kolmogorov-  
36 Smirnov test (1) indicates that the real and simulated shape parameters are very likely to  
37 have the same underlying distribution. These results give us confidence in our decision  
38 to treat the shape parameter as spatially constant.

### 39 **Parameter layer of the Bayesian hierarchical model**

40 Here we adopt a full Bayesian approach, and hence all model parameters are estimated  
41 from the observations. Note that, in order to facilitate sampling in our model, some  
42 parameters are rescaled so that they are approximately on a unit scale. The following  
43 priors are ascribed to the (rescaled, where appropriate) model parameters:

- 44 – For the shape parameter  $\xi$  we assume a uniform distribution:  $\xi \sim \mathcal{U}(-0.3, 0.3)$ .  
45 The lower and upper bounds are selected based on the results of individual GEV  
46 fits to the observed annual maxima.
- 47 – The parameter  $\alpha$  is bounded to be in the range  $(0, 1)$ , and thus we let  $\alpha \sim \mathcal{U}(0, 1)$ .

- 48 – The length scale of the kernel functions,  $\tau$ , is assigned a half-normal  
49 distribution:  $\tau \sim \text{half-}\mathcal{N}(0,0.5)$ . A standard deviation of 0.5 corresponds to half  
50 the synoptic scale ( $\sim 1000/2$  km), which is a measure of the spatial extent of  
51 extratropical cyclones.
- 52 – For the standard deviations of the Gaussian processes we assume a half-normal  
53 distribution:  $\gamma_\mu, \gamma_{\mu_0}, \gamma_{\mu_{00}}, \gamma_\sigma \stackrel{\text{ind}}{\sim} \text{half-}\mathcal{N}(0,1)$ . A half-normal distribution is one of  
54 the recommended priors for scale parameters in hierarchical models (2,  
55 <https://github.com/stan-dev/stan/wiki/Prior-Choice-Recommendations>) as it  
56 enables us to constrain the value of a parameter from above while allowing it to  
57 be arbitrarily close to zero.
- 58 – In assigning priors to the length scale parameters of the Gaussian processes, we  
59 should note that there is no information in the observed data to characterize  
60 scales above the maximum distance between stations. The priors should encode  
61 this information, and hence we impose a half-normal distribution:  
62  $\rho_\mu, \rho_{\mu_0}, \rho_{\mu_{00}}, \rho_\sigma \stackrel{\text{ind}}{\sim} \text{half-}\mathcal{N}(0,0.7)$ . A standard deviation of 0.7 corresponds to  
63 about one third of the maximum distance between stations.
- 64 – For the regression coefficients,  $\beta_\mu$  and  $\beta_\sigma$ , we assume a normal distribution:  
65  $\beta_\mu, \beta_\sigma \stackrel{\text{ind}}{\sim} \mathcal{N}(0,1.5)$ .

66 The prior distributions are shown in SI Appendix, Fig. S2. To assess the sensitivity of  
67 our results to prior choices, we have compared estimates for the cases where the scale  
68 parameters of the Gaussian processes are assigned the following priors:  $\text{half-}\mathcal{N}(0,1)$ ,  
69  $\text{half-}\mathcal{N}(0,2)$ ,  $\text{half-}\mathcal{N}(0,10)$ . The results are shown in the SI Appendix, Table S1. We  
70 note that the estimates of the various scale parameters ( $\gamma_\mu, \gamma_{\mu_0}, \gamma_{\mu_{00}}, \gamma_\sigma$ ) are fairly  
71 consistent across all three cases. Furthermore, differences in the estimates of the GEV  
72 location and scale parameters among the three cases are negligible. Our estimates are  
73 also fairly insensitive to the choice of priors for all the other parameters. However, as  
74 mentioned above, the assignment of priors to the length scales of the Gaussian  
75 processes needs careful consideration, especially for  $\rho_{\mu_0}$  and  $\rho_{\mu_{00}}$ . In particular, the  
76 likelihood for these two parameters can become non-identified if the scale of the half-  
77 normal prior is set to a large value.

78

## 79 **Validation with simulated data in a perfect model setting**

80 Here we estimate the skill of the model in a perfect model setting. We first simulate a  
81 spatiotemporal process under a max-stable model and sample it at exactly the same  
82 times and locations as the tide gauge record (see Materials and Methods for a  
83 description of the tide gauge data set and SI Appendix, Fig. S1 for site locations and  
84 availability through time). Then, we fit our hierarchical model to the synthetic tide  
85 gauge data and inspect whether the model is able to adequately characterize the  
86 simulated process, at both gauged and ungauged locations. Estimates from the  
87 hierarchical model are compared to estimates derived using a single-site GEV model, as  
88 a way of establishing a baseline against which to measure the skill of our model. In this  
89 experiment, the GEV location and scale parameters ( $\mu$  and  $\sigma$ ) are spatially variable,  
90 whereas the shape parameter  $\xi$  is kept constant. Note that, since here  $\mu$  is assumed  
91 constant in time,  $\mu_{trend,t} = 0$  and thus  $\mu_t = \mu_{t=0}$  for all  $t$  (see model formulation). The  
92 single-site model used here involves fitting a GEV separately at each site using  
93 maximum likelihood estimation, which is the most commonly used method. The results  
94 presented next are based on a single realization of a max-stable process, but comparable  
95 results are found for other realizations.

96 We first note that the hierarchical model captures the true value of all model parameters  
97 (SI Appendix, Fig. S6), including the length scales ( $\rho_\mu, \rho_{\mu_0}$ ) and standard deviations  
98 ( $\gamma_\mu, \gamma_{\mu_0}$ ) of the Gaussian processes, which are in general weakly identified and difficult  
99 to estimate (3). We note that the value of the parameters used in the simulations has  
100 been chosen to be similar to that found in the real tide gauge data, and so, assuming the  
101 adequacy of the model, we can expect an equivalent performance when analyzing the  
102 actual observations.

103 Next, we evaluate the skill of the hierarchical model in estimating the marginal GEV  
104 parameters  $\mu$  and  $\sigma$ , at gauged locations. Model skill is assessed in terms of fractional  
105 differences (FDs) (see Materials and Methods). The standard errors associated with the  
106 estimated values are also shown. Estimates of  $\mu$  based on the hierarchical model are  
107 very close to the true value at all gauged locations, as indicated by a median FD of 0.03  
108 (SI Appendix, Fig. S7A). The single-site model also gives a very good match to the true  
109 values with a median FD of 0.03 (SI Appendix, Fig. S7B). While both models exhibit  
110 very small FDs, the hierarchical model yields much more precise estimates, as indicated

111 by their smaller standard errors (median of 2.4 cm vs 3.4 cm) (SI Appendix, Fig. S7C  
112 and D).

113 Differences in performance between the two models become even more apparent when  
114 looking at the scale parameter  $\sigma$  (SI Appendix, Fig. S8), for which the hierarchical  
115 model exhibits smaller FDs (median of 0.08 vs 0.11) and standard errors that are almost  
116 half those of the single-site model (median of 1.5 cm vs 2.6 cm). Note also that, while  
117 the FDs and standard errors for the hierarchical model are fairly uniform across stations,  
118 those for the single-site model show a much larger spread. In particular, there are  
119 several stations where FDs for the single-site model are larger than 0.4 and standard  
120 errors are more than three times larger than those from the hierarchical model.  
121 Furthermore, there are two stations where the single-site model is unable to provide an  
122 estimate due to convergence failure, highlighting the difficulty of this model to  
123 constrain the GEV parameters at sites with few data.

124 The hierarchical model has also a good predictive skill in capturing both  $\mu$  and  $\sigma$  at  
125 ungauged sites (SI Appendix, Fig. S9), with median FDs of 0.09 and 0.10 and median  
126 standard errors of 14.9 cm and 2.3 cm, respectively. As expected, FDs and standard  
127 errors tend to be larger at locations distant from any tide gauge station, but even at such  
128 locations the differences between the true and estimated values tend to be much smaller  
129 than the value of the parameter, providing confidence in the skill of the model at  
130 ungauged sites. In particular, FDs  $< 0.5$  are found at more than 92% of all interpolation  
131 sites, for both  $\mu$  and  $\sigma$ . Note also that FDs and standard errors for  $\sigma$  at ungauged  
132 locations are slightly smaller than those for the single-site model at gauged sites.

133 To estimate the skill of the model in interpolating the annual maxima we use the  
134 Spearman's rank correlation between the true and predicted extreme values, and the  
135 fraction of true extreme values that fall within the 1-sigma credible interval (see  
136 Materials and Methods). The mean Spearman's rank correlation over all prediction sites  
137 is 0.70 (SI Appendix, Fig. S10A), indicating a good predictive skill. Furthermore,  
138 correlations  $> 0.5$  are found at 96% of the locations, showing that model skill is largely  
139 independent of location. We find that the 1-sigma credible interval encompasses the true  
140 extreme value, on average, 73% of the times (SI Appendix, Fig. S10B).

141

142 **Validation with reanalysis data from a dynamical surge model**

143 The results of the experiment with real tide gauge data represent our most accurate  
144 assessment of the predictive skill and accuracy of the hierarchical model in the real  
145 world. However, such assessment is only possible at gauged locations. A surge  
146 reanalysis, though being only an approximate representation of the real world, gives us  
147 an opportunity to assess the model at additional locations and allows for a further  
148 assessment of the adequacy of the model. Here, we sample the annual maxima from the  
149 reanalysis at the same times and locations as the tide gauge record, then fit our  
150 hierarchical model to the sampled data and make predictions of the GEV parameters  
151 and the annual maxima at ungauged locations where the reanalysis provides data. The  
152 predictions of  $\mu$  and  $\sigma$  are compared with estimates based on individual GEV fits to the  
153 full (i.e., no missing values) reanalysis data, whereas the predicted annual maxima are  
154 compared with the actual annual maxima from the reanalysis.

155 The  $\mu$  and  $\sigma$  parameters are well captured at most locations (SI Appendix, Fig. S11A  
156 and B), with median FDs of 0.07 and 0.20, respectively. The FDs show significant  
157 uniformity across most sites, but in the case of  $\sigma$  we note increased FD values ( $\sim 0.7$ )  
158 along the southern coast of England. Additional analysis suggests that these larger  
159 values are due to a sharp gradient in the variance of the reanalysis annual maxima  
160 across the English Channel (SI Appendix, Fig. S12A), which the hierarchical model is  
161 unable to capture. The fact that the actual tide gauge observations do not show such a  
162 pronounced gradient (SI Appendix, Fig. S12B) suggests that the gradient might be a  
163 model artefact. Regardless, FDs for  $\mu$  and  $\sigma$  are  $< 0.5$  at 98% and 87% of the locations,  
164 respectively, which again confirms the high accuracy of the model. For the prediction of  
165 the annual maxima, we find a very high mean Spearman's rank correlation of 0.89 and a  
166 fraction of annual maxima contained by the 1-sigma credible interval of 0.81 (average  
167 value) (SI Appendix, Fig. S11C and D). This correlation is significantly higher than the  
168 one found in the validation with real data (0.62). The reason is that residual dependence  
169 in the reanalysis is much stronger than in the observations, as indicated by the smaller  
170 value of the parameter  $\alpha$  in the reanalysis (0.25 vs 0.54).

171 **Extraction of annual maxima from the tide gauge records**

172 Our analysis of extremes is based on surge annual maxima, which are extracted from  
173 each tide gauge record as follows. First, it is important to recognize that tide gauge

174 records often contain datum shifts that, if went unnoticed, could result in anomalous  
175 extreme values. To identify and correct jumps in the sea-level records, we use a  
176 parametric global method (4) that aims to detect abrupt changes in the mean of a signal.  
177 This algorithm is applied to the low-pass filtered (cutoff 36 hours) records subject to the  
178 condition that there should be a minimum of 15 days between changepoints. This  
179 condition is necessary to avoid falsely identifying changes associated with surges as  
180 datum shifts. The identified jumps are then adjusted in the original records by correcting  
181 the mean difference at changepoints.

182 At this point, we note that waves are typically filtered out from tide gauge records,  
183 either mechanically or by time averaging of the sea-level records. Wave setup effects  
184 are not explicitly removed, however such effects are generally not captured by tide  
185 gauges due to their location inside harbors where water is relatively deep (compared to  
186 shallow sloping beaches on which wave setup is most important). This means that the  
187 part of sea level that remains after removal of the tide and the mean sea level is  
188 primarily the storm surge. As a means of removing the mean sea level, the annual  
189 medians along with a seasonal cycle are subtracted from the shift-adjusted tide gauge  
190 records. Note that this eliminates any influence from sea-level rise and other long-term  
191 sea-level variations on the annual maxima. The tidal component is then estimated, on a  
192 year-by-year basis, through harmonic analysis using the program t-tide (5) and removed  
193 from the time series to obtain the surges. In doing this, we note that sometimes tide-  
194 surge interaction and timing errors can cause inaccuracies in the tidal predictions,  
195 leading to artificially large surges. This issue is addressed by first computing the  
196 instantaneous phase difference between the observed and predicted signals at the  
197 frequency of the main tidal constituent using the Hilbert transform, and then shifting (in  
198 time space) the tidal prediction by the amount necessary to remove the phase difference.  
199 The shifting is applied cycle by cycle and only if the phase difference in the cycle is  
200 larger than 30 minutes. We should note that only a small number of extreme events in  
201 the final set correspond to cycles where a phase-shift correction has been applied. The  
202 hourly residual time series after removal of the mean sea level and the tides are then  
203 visually inspected to identify and remove outliers. Finally, we extract the annual  
204 maxima from the residual time series, where we should note that years are defined as  
205 starting on 1 April and only years with at least 6000 valid hourly values are considered.  
206 The final set of extremes consists of 2500 annual maxima from a total of 79 tide gauge  
207 records spanning the period 1960-2013 (the location of the tide gauges is shown in SI

208 Appendix, Fig. S1A). Note that the number of tide gauge sites with available data  
209 decreases rapidly as we go backwards in time (SI Appendix, Fig. S1B).

### 210 **MCMC diagnostics for the Bayesian hierarchical model**

211 Here we validate the fit of the hierarchical model to the real annual maxima data  
212 through a number of MCMC diagnostics. This part of the validation aims to assess  
213 whether the sampler has converged and provides good mixing. We begin by looking at  
214 convergence diagnostics. While, in practice, there is no definitive way to prove  
215 convergence, there are a number of diagnostics that allow us to check certain necessary  
216 (albeit not sufficient) conditions for convergence. One of such conditions is that, in  
217 equilibrium, samples from different Markov chains should all have the same  
218 distribution, regardless of the initial values of the chains. The potential scale reduction  
219 statistic (6),  $\hat{R}$ , tests for this by comparing the sample variances both within individual  
220 chains and across multiple randomly initialized chains. At convergence  $\hat{R}$  should be  
221 close to 1 for all parameters in the model, whereas  $\hat{R} > 1.1$  is indicative of non-  
222 convergence. We find that  $\hat{R}$  is below 1.1 for all parameters in our model, suggesting  
223 that all four Markov chains have converged to the equilibrium distribution and are  
224 providing a good approximation to the posterior distribution.

225 In addition to the issue of convergence, another difficulty posed by MCMC methods is  
226 that they tend to produce highly correlated samples. The higher the autocorrelation the  
227 larger the MCMC standard error, and thus the further the posterior mean will be from  
228 the true value of the parameters. As a measure of autocorrelation, we use an estimate of  
229 the effective sample size,  $n_{eff}$ , for each parameter (7). In general, a  $n_{eff}$  per iteration  $<$   
230 0.001 is indicative of poorly mixing chains and suggestive of possible biased estimates.  
231 In our hierarchical model, we find  $n_{eff} > 0.3$  for most parameters, with the parameter  
232  $\alpha$  showing the lowest  $n_{eff}$  among all parameters with a value of 0.02. These results  
233 indicate low autocorrelation and good mixing.

234 Finally, there are several additional diagnostics specific to Hamiltonian Monte Carlo,  
235 such as divergent transitions and maximum tree depth, which can help diagnose  
236 problems with the sampler. In particular, the presence of divergences and/or tree-depth  
237 saturation indicates that the sampler is not able to fully explore the posterior distribution  
238 and the estimates are likely to be biased. Our analysis of these diagnostics shows that  
239 there were no divergences in our fit and none of the iterations saturated the maximum  
240 tree depth.



241 All diagnostics reported above indicate that the hierarchical model provides an adequate  
242 fit to the observed annual maxima and that our sampler is accurately characterizing the  
243 posterior distribution.  
244

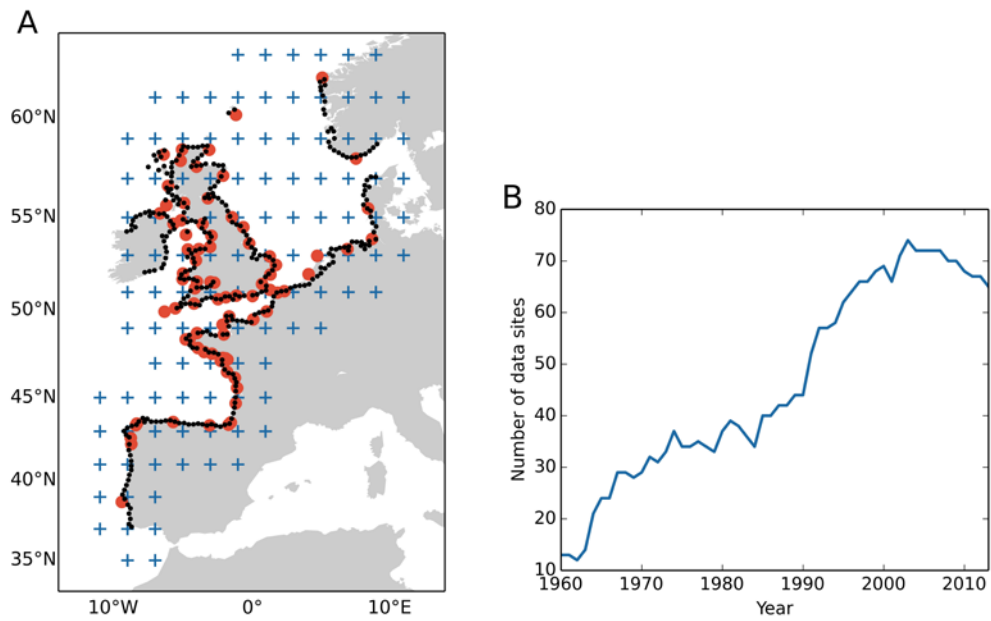

245

246 **Figure S1. Availability of the tide gauge data.** (A) Location of the tide gauge stations  
 247 used in the analysis of extremes (red circles), along with the interpolation grid points  
 248 (black dots) and the spatial knots used to construct the spatial residual process (blue  
 249 crosses). (B) The number of tide gauge sites providing data over time (1960-2013).

250

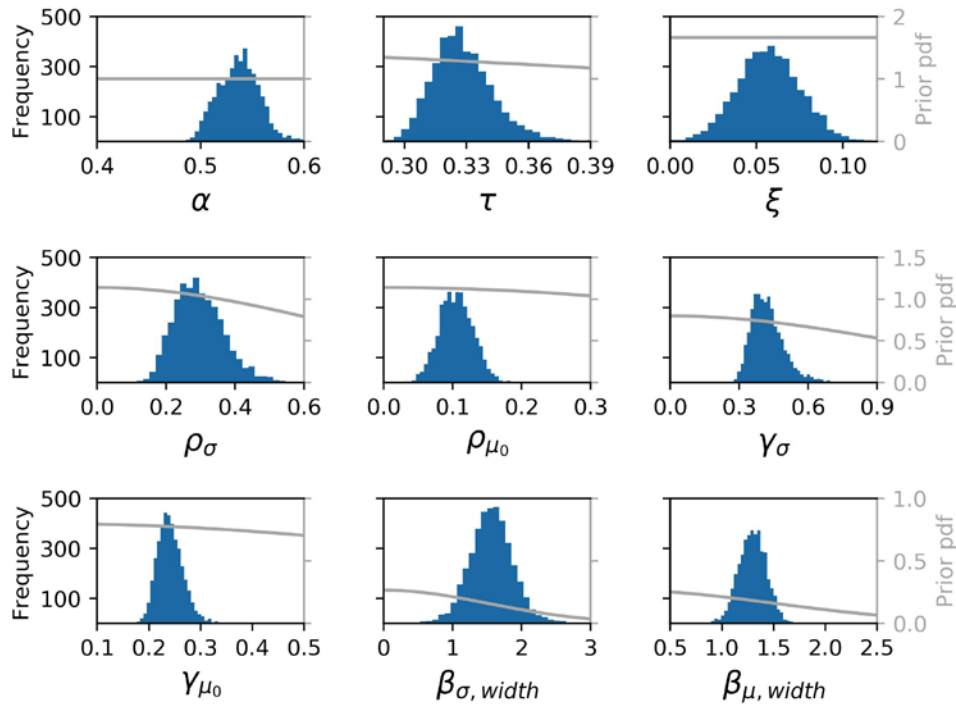

251  
 252 **Figure S2. The posterior distribution for model parameters in the probabilistic**  
 253 **reanalysis of storm surge extremes.** Histograms of 4000 draws from the posterior  
 254 distribution for  $\alpha$ ,  $\tau$ ,  $\xi$ ,  $\rho_\sigma$ ,  $\rho_{\mu_0}$ ,  $\gamma_\sigma$ ,  $\gamma_{\mu_0}$ ,  $\beta_{\sigma, width}$  and  $\beta_{\mu, width}$  (the subscript *width*  
 255 denotes regression coefficient associated with the shelf width) as estimated by the  
 256 Bayesian hierarchical model based on the real tide gauge data. The prior distributions  
 257 are also shown (gray, right y-axis).  
 258

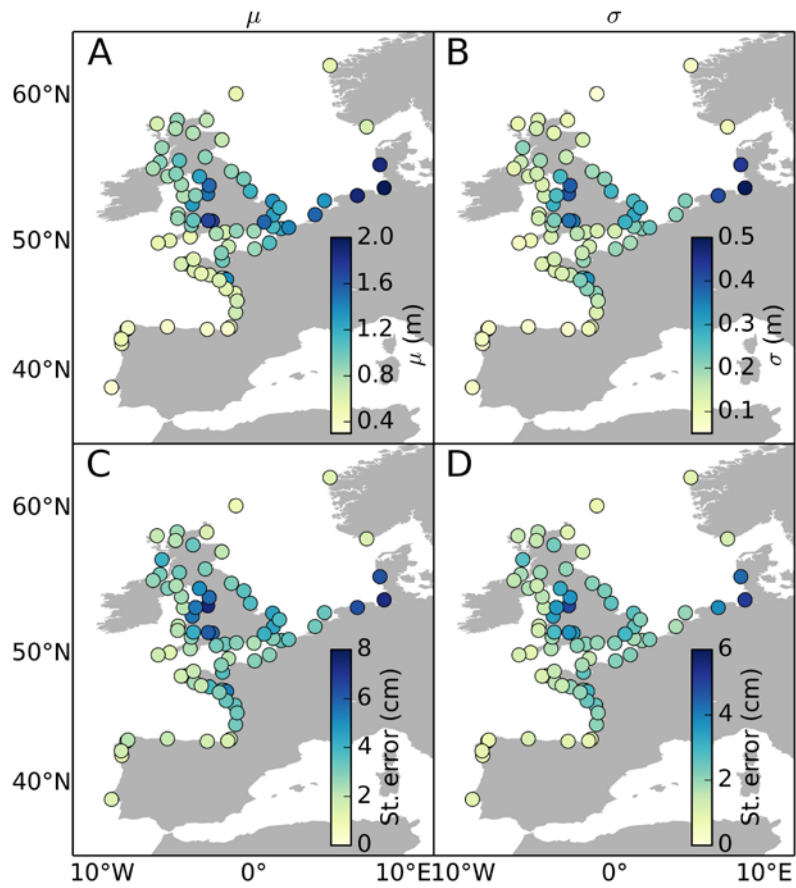

259  
 260  
 261  
 262  
 263  
 264

**Figure S3. Bayesian estimates of the GEV parameters from real tide gauge data at gauged locations.** Estimates from the hierarchical model at gauged locations for the GEV time-mean location (A) and scale (B) parameters, along with their standard errors (C and D).

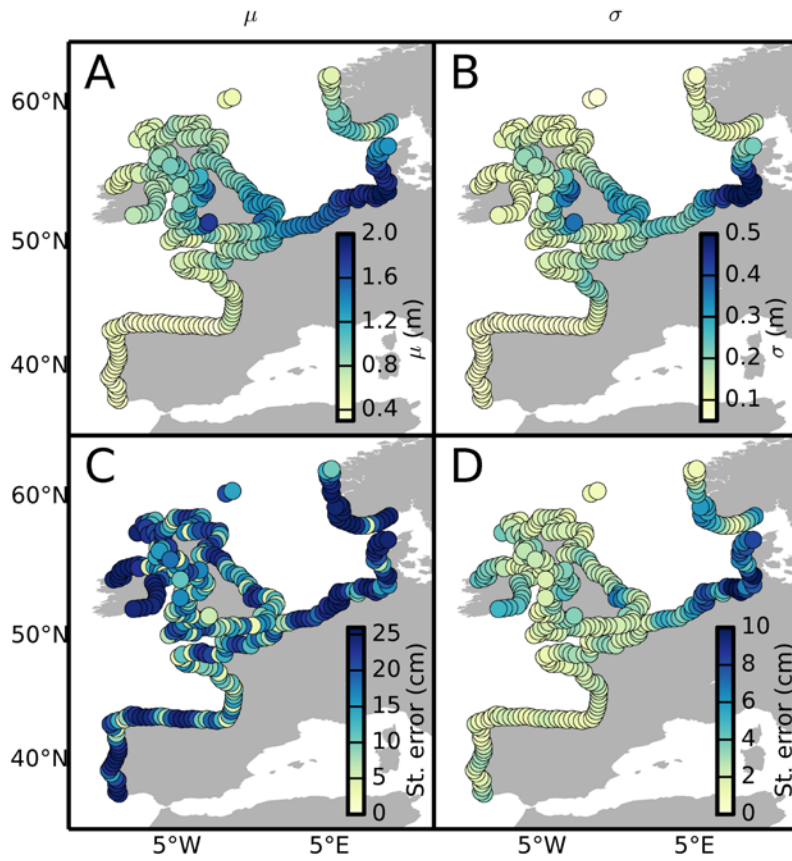

265

266 **Figure S4. Bayesian estimates of GEV parameters at ungauged locations.** Gridded  
 267 estimates of the GEV time-mean location (A) and scale (B) parameters from the  
 268 hierarchical model, along with their standard errors (C and D).

269

270

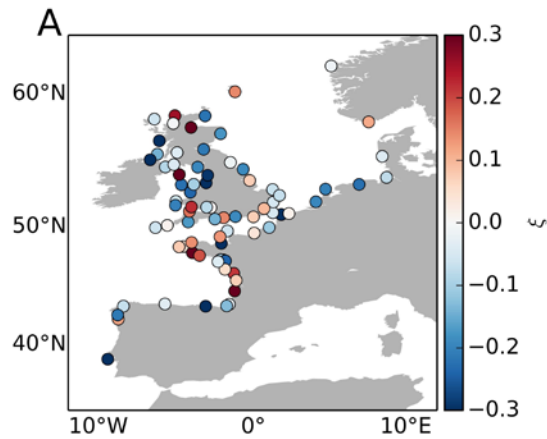

271  
272

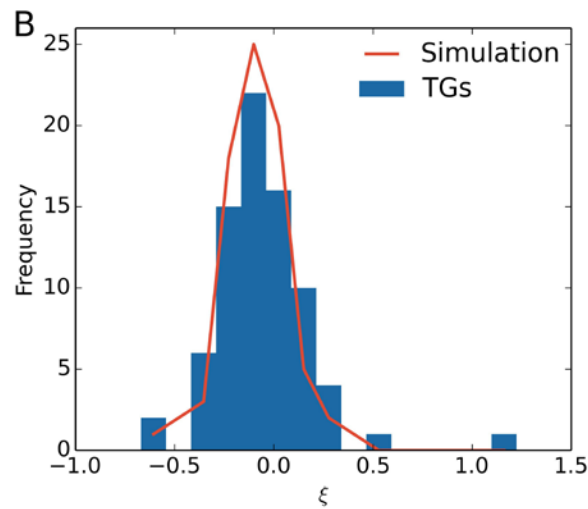

273

274 **Figure S5. The spatial structure of the GEV shape parameter.** (A) Estimates of the  
 275 shape parameter at each tide gauge location based on a single-site GEV model  
 276 (estimates at two locations have been omitted due to lack of convergence of the  
 277 maximum likelihood estimator) applied to the observed annual maxima. (B) histogram  
 278 of the shape parameter estimates shown in panel A, along with the histogram of the  
 279 shape parameter values derived from simulated data based on a GEV with constant  
 280 shape parameter.

281

282

283

284

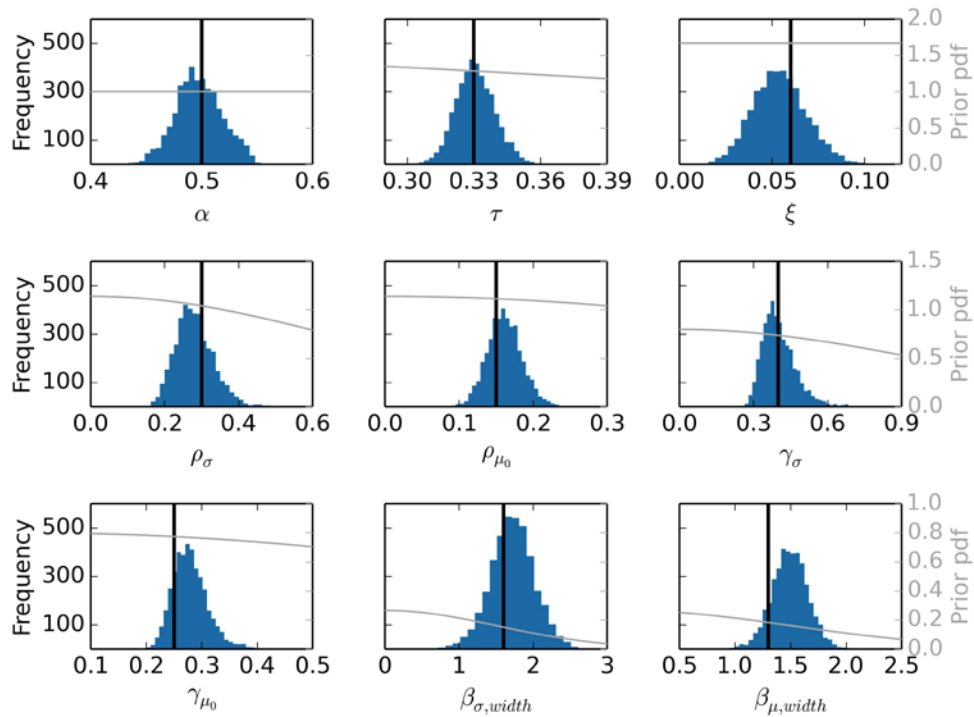

285

286 **Figure S6. The posterior distribution for model parameters in the validation with**  
 287 **simulated data in a perfect model setting.** Histograms of 4000 draws from the  
 288 posterior distribution for  $\alpha$ ,  $\tau$ ,  $\xi$ ,  $\rho_\sigma$ ,  $\rho_{\mu_0}$ ,  $\gamma_\sigma$ ,  $\gamma_{\mu_0}$ ,  $\beta_{\sigma,width}$  and  $\beta_{\mu,width}$  (the subscript  
 289 *width* denotes regression coefficient associated with the shelf width) as estimated by the  
 290 Bayesian hierarchical model based on simulated data generated under a max-stable model. The vertical black line denotes the true value of the parameters. The prior  
 291 distributions are also shown (gray, right y-axis).  
 292  
 293

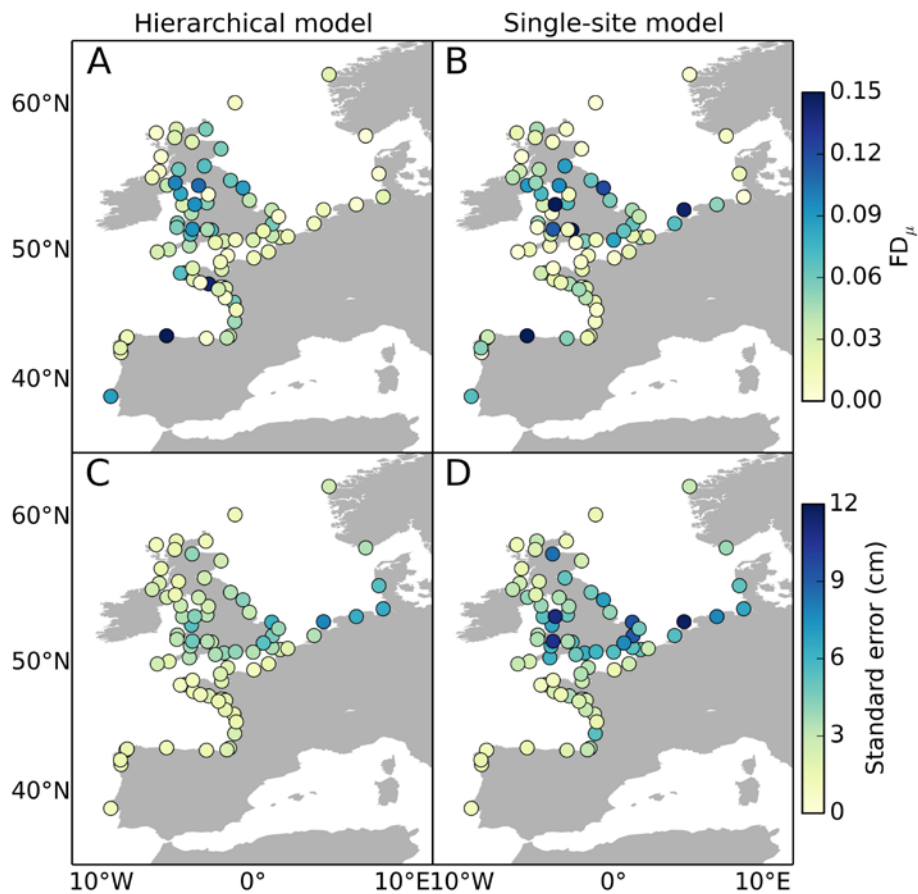

294  
 295  
 296  
 297  
 298  
 299  
 300

**Figure S7. Validation of the GEV location parameter with simulated data in a perfect model setting at gauged locations.** Fractional differences (FDs) between the true value of the GEV location parameter  $\mu$  at gauged locations and model estimates from a spatiotemporal hierarchical model (A) and from a single-site GEV model (B), along with the standard errors associated with such estimates (C and D).



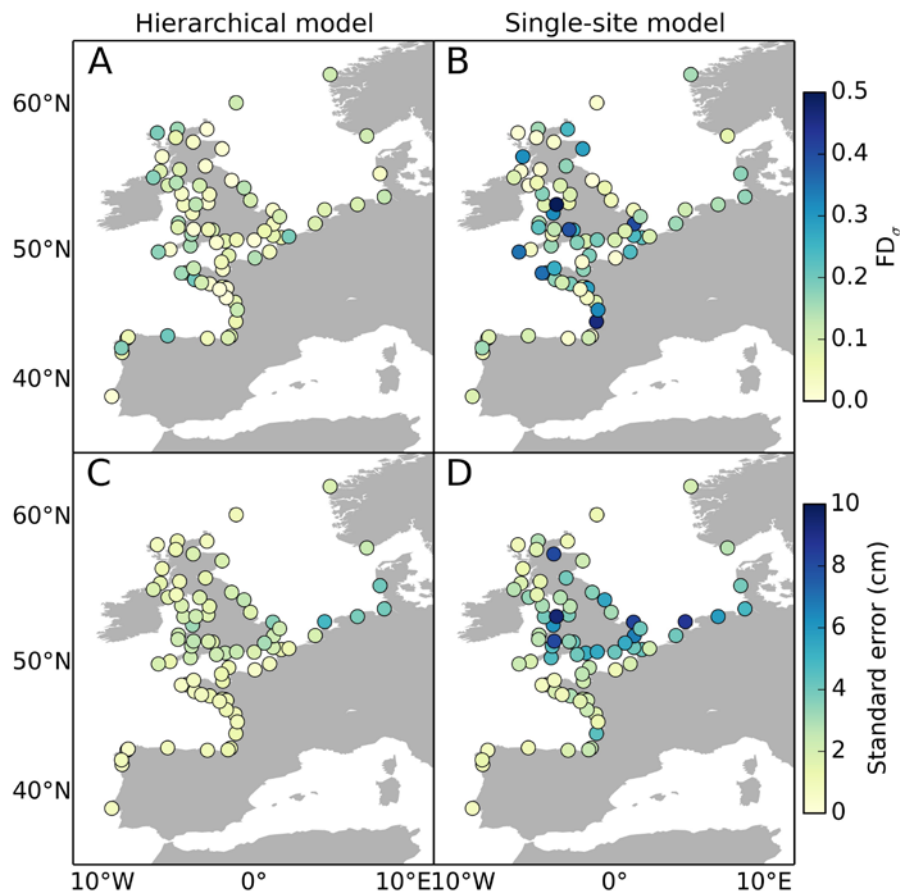

301  
 302  
 303  
 304  
 305  
 306  
 307

**Figure S8. Validation of the GEV scale parameter with simulated data in a perfect model setting at gauged locations.** Fractional differences (FDs) between the true value of the GEV scale parameter  $\sigma$  at gauged locations and model estimates from a spatiotemporal hierarchical model (A) and from a single-site GEV model (B), along with the standard errors associated with such estimates (C and D).

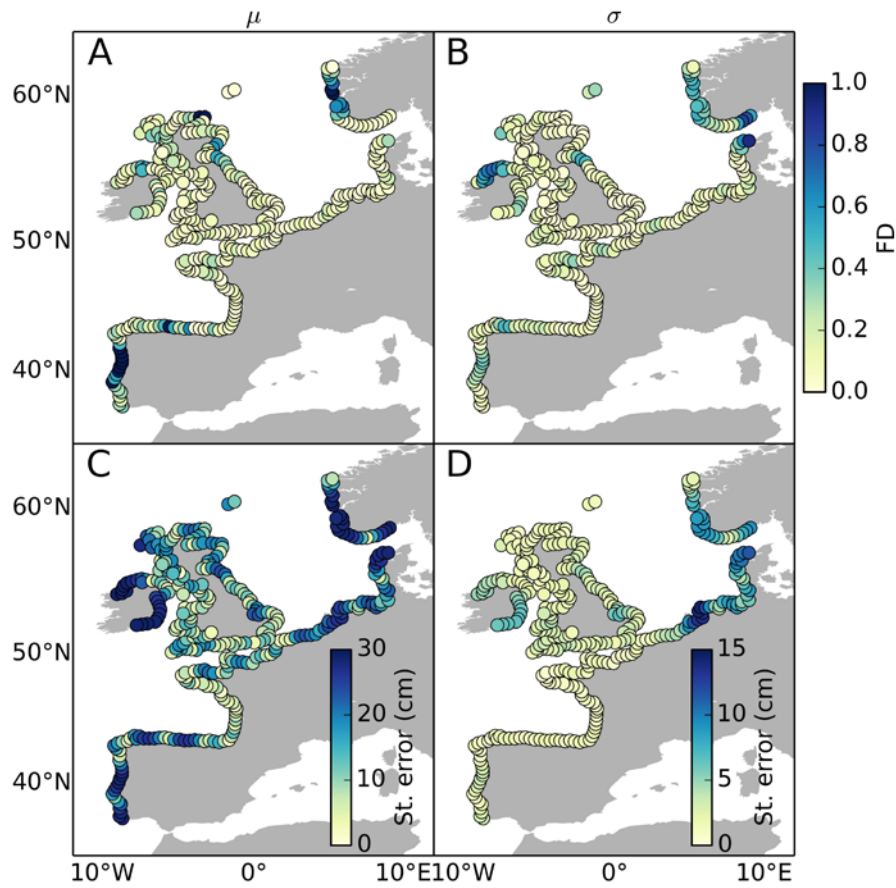

308  
 309  
 310  
 311  
 312  
 313  
 314

**Figure S9. Validation of the GEV location and scale parameters with simulated data in a perfect model setting at ungauged locations.** Fractional differences (FDs) between the true and estimated values of the GEV location (A) and scale (B) parameters at interpolation locations, along with the standard errors associated with the estimates (C and D).

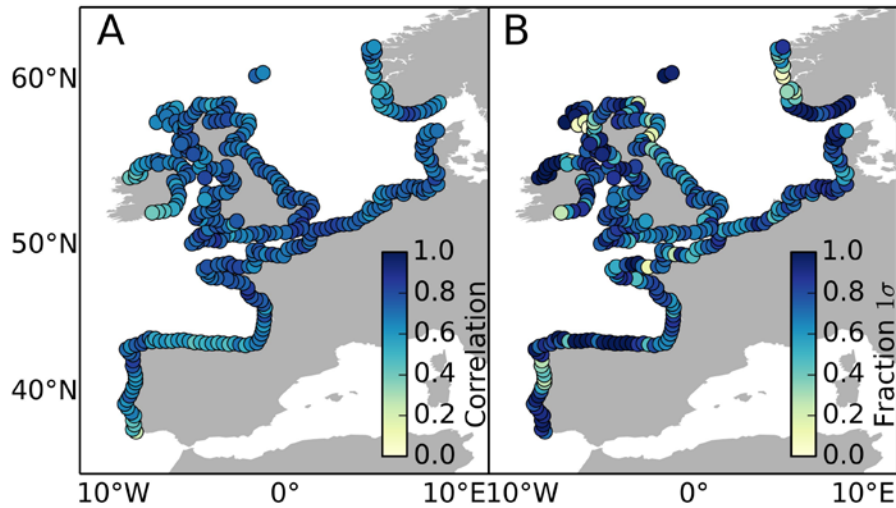

**Figure S10. Validation of the predicted annual maxima with simulated data in a perfect model setting.** Spearman's rank correlation between the true and predicted extreme values at ungauged locations based on the simulated data (A), and the fraction of 1-sigma credible intervals that contain the true extreme value (B).

315  
 316  
 317  
 318  
 319  
 320  
 321  
 322  
 323  
 324  
 325  
 326  
 327  
 328  
 329  
 330  
 331  
 332  
 333  
 334  
 335  
 336  
 337  
 338  
 339  
 340  
 341  
 342  
 343  
 344  
 345  
 346  
 347  
 348  
 349  
 350  
 351

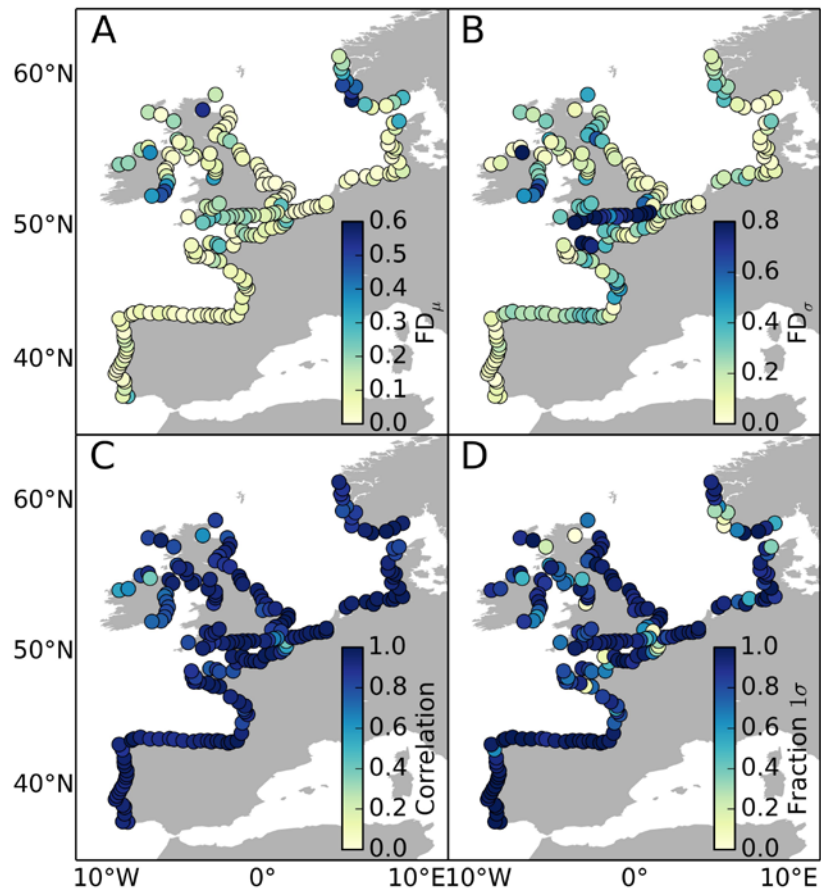

353

354

**Figure S11. Validation with reanalysis data from a dynamical surge model.**

355

Fractional differences (FDs) between the true (single-site model estimates based on

356

the full reanalysis data) and the predicted values of the GEV location (A) and scale

357

(B) parameters. The Spearman's rank correlation between the true and predicted

358

annual maxima (C), along with the fraction of 1-sigma credible intervals that contain

359

the true extreme value (D), are also shown.

360

361

362

363

364

365

366

367

368

369

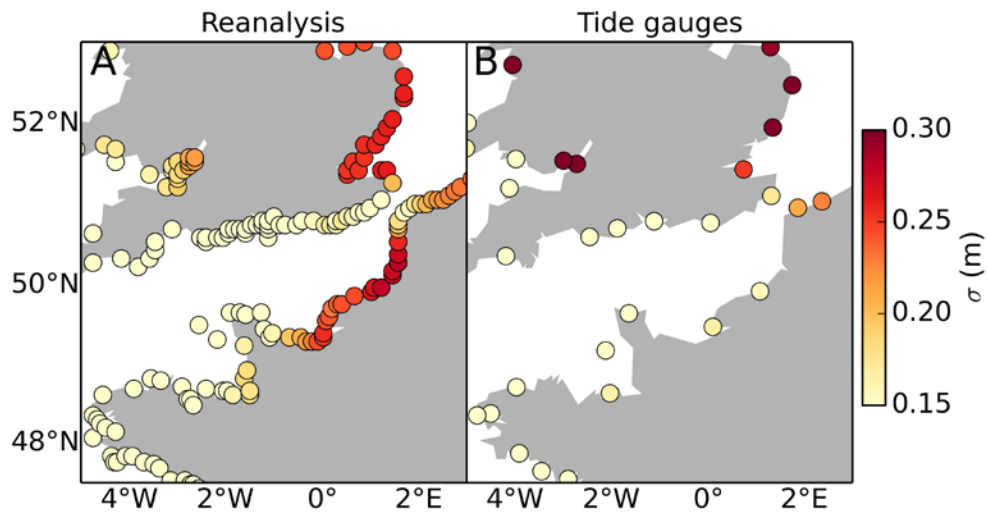

370

371

372

373

374

**Figure S12. Sharp gradient of the GEV scale parameter in the dynamical surge reanalysis.** Comparison of the GEV scale parameter at every grid point in the surge reanalysis (A) with that at tide gauge stations (B). The scale parameter values have been estimated by individual GEV fits to the annual maxima.

375 **Table S1.** Estimates (mean  $\pm$  1-sigma) of the scale parameters of the Gaussian  
376 processes ( $\gamma_\mu, \gamma_{\mu_0}, \gamma_{\mu_{00}}, \gamma_\sigma$ ) under the following prior distributions: half- $\mathcal{N}(0,1)$ ,  
377 half- $\mathcal{N}(0,2)$ , half- $\mathcal{N}(0,10)$ . The mean difference (over the 79 tide gauge stations) in  
378 estimates of the GEV location ( $d\mu$ ) and scale ( $d\sigma$ ) parameters respect to the case with  
379 a half- $\mathcal{N}(0,1)$  prior is also shown for all three cases.

| Prior                     | $\gamma_\mu$    | $\gamma_\sigma$ | $\gamma_{\mu_0}$ | $\gamma_{\mu_{00}}$ | $d\mu(\%)$ | $d\sigma(\%)$ |
|---------------------------|-----------------|-----------------|------------------|---------------------|------------|---------------|
| half- $\mathcal{N}(0,1)$  | 0.24 $\pm$ 0.03 | 0.43 $\pm$ 0.08 | 0.15 $\pm$ 0.11  | 0.39 $\pm$ 0.26     | 0.00       | 0.00          |
| half- $\mathcal{N}(0,2)$  | 0.24 $\pm$ 0.03 | 0.42 $\pm$ 0.07 | 0.16 $\pm$ 0.11  | 0.37 $\pm$ 0.27     | 0.15       | 0.54          |
| half- $\mathcal{N}(0,10)$ | 0.24 $\pm$ 0.03 | 0.42 $\pm$ 0.07 | 0.17 $\pm$ 0.12  | 0.45 $\pm$ 0.32     | 0.17       | 0.77          |

380  
381

382 **SI References**

383

384 1. Massey, F. J., The Kolmogorov-Smirnov Test for Goodness of Fit. *J. Am. Stat.*  
385 *Assoc.* **46**, 68–78 (1951).

386 2. A. Gelman, Prior distributions for variance parameters in hierarchical models.  
387 *Bayes. Anal.* **1**, 515–533 (2006).

388 3. H. Zhang, Inconsistent estimation and asymptotically equal interpolations in  
389 model-based geostatistics. *J. Am. Stat. Assoc.* **99**(465), 250–261 (2004).

390 4. R. Killick, P. Fearnhead, I. A. Eckley, Optimal detection of changepoints with a  
391 linear computational cost. *J. Am. Stat. Assoc.* **107**, 1590–1598 (2012).

392 5. R. Pawlowicz, B. Beardsley, S. Lentz, Classical tidal Harmonic Analysis  
393 Including Error Estimates in MATLAB using T\_TIDE. *Comput. Geosci.* **28**,  
394 929–937 (2002).

395 6. A. Gelman, D. B. Rubin, Inference from Iterative Simulation Using Multiple  
396 Sequences. *Stat. Sci.* **7** (4), 457–72 (1992).

397 7. A. Gelman et al., Bayesian Data Analysis, 3rd ed., Chapman and Hall/CRC  
398 Press, Boca Raton, Fla. (2014).
